# Supplementary material
Source: HighWire-hosted journal article supplement (https://ard.bmj.com/content/76/6/1036)
Supplement: inline-supplementary-material-1 [file inline-supplementary-material-1.pdf]

**Supplementary table 1:**

**Model fitting according to BIC to select number of trajectories**

| Number of trajectories | Fit of the model             |
|------------------------|------------------------------|
| 1                      | BIC= -2563.86 (N=370)        |
| 2                      | BIC= -2319.34 (N=370)        |
| 3                      | BIC= -2305.62 (N=370)        |
| 4                      | BIC= -2285.06 (N=370)        |
| <b>5</b>               | <b>BIC= -2263.63 (N=370)</b> |
| 6                      | BIC= -2272.32 (N=370)        |

Abbreviations: BIC= Bayesian Information Criteria
